# Supplementary material
Source: PubMed Central journal article supplement (PMC2526347)
Supplement: NIHMS60843-supplement-si20051007_095.pdf [file NIHMS60843-supplement-si20051007_095.pdf]

## Quantitation of Four Guanine Oxidation Products from Reaction of DNA with Varying Doses of Peroxynitrite

Hongbin Yu<sup>a</sup>, Lata Venkatarangan<sup>a</sup>, John S. Wishnok<sup>a</sup>, and Steven R. Tannenbaum<sup>a, b\*</sup>

<sup>a</sup> Division of Biological Engineering, <sup>b</sup> Department of Chemistry

Massachusetts Institute of Technology, 77 Massachusetts Avenue, Room 56-731A, Cambridge, Massachusetts 02139

### Supporting Information

#### Contents:

#### 1. List of Figures

- (1) HPLC chromatogram of purification of 8-oxodG from oxidation of dG nucleoside
- (2) Figure 2 ESI-MS of the uniformly <sup>13</sup>C, <sup>15</sup>N labeled 8-oxodG standard
- (3) Figure 3 HPLC Chromatogram of converting imidazolone nucleoside to oxazolone nucleoside
- (4) Figure 4 ESI-MS of the uniformly <sup>13</sup>C, <sup>15</sup>N labeled oxazolone standard
- (5) Figure 5 HPLC chromatogram of purification of spiroiminodihydantoin standard from dC, dT, dG and dA nucleosides
- (6) Figure 6 ESI-MS of the uniformly <sup>13</sup>C, <sup>15</sup>N labeled spiroiminodihydantoin standard
- (7) Figure 7 HPLC chromatogram of purification of 8-oxodG from dC, dT, dG and dA nucleosides
- (8) Figure 8 Purification of oxazolone standard from untreated DNA digestion mixture
- (9) Figure 9 MRM chromatograms of detection of 8-oxodG in untreated DNA by LC-MS/MS in the presence of 7-<sup>15</sup>N-dG

- (10) Figure 10 MRM chromatograms of attempt to detect oxazolone in untreated DNA by LC-MS/MS in the presence of 1,2,7-<sup>15</sup>N<sub>3</sub>-8-oxodG. No oxazolone was detected in untreated DNA
- (11) Figure 11 MRM chromatograms of detection of spiroiminodihydantoin in untreated DNA by LC-MS/MS on a capillary C18 column in the presence of 1,2,7-<sup>15</sup>N<sub>3</sub>-8-oxodG
- (12) Figure 12 MRM chromatograms of detection of spiroiminodihydantoin in untreated DNA by LC-MS/MS on a capillary hypercarb column
- (13) Figure 13 MRM chromatograms of detection of guanidinohydantoin in untreated DNA by LC-MS/MS in the presence of uniformly <sup>13</sup>C, <sup>15</sup>N labeled 8-oxodG

## 2. Calculation equations

- (1) determination of the yield of DNA digestion
- (2) determination of the artifacts of 8-oxodG
- (3) determination of the artifacts of spiroiminodihydantoin
- (4) determination of the artifacts of guanidinohydantoin

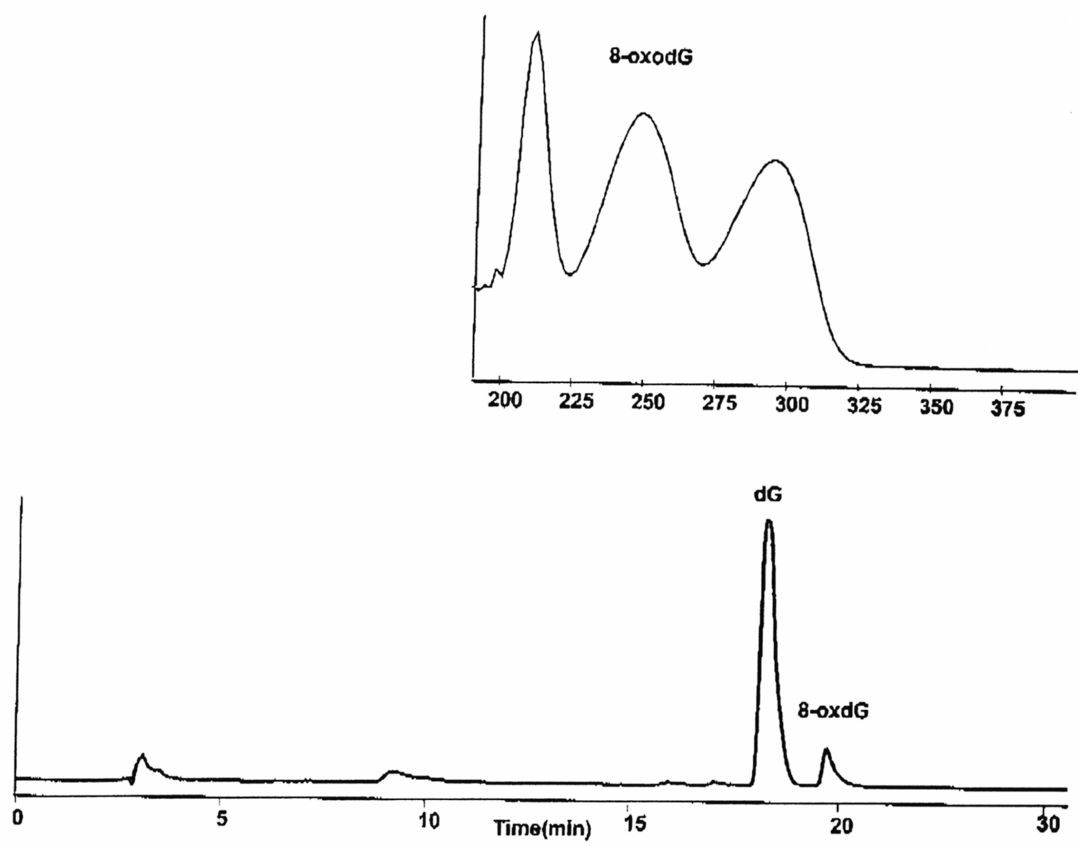

Figure 1 HPLC chromatogram of purification of 8-oxodG from oxidation of dG nucleoside

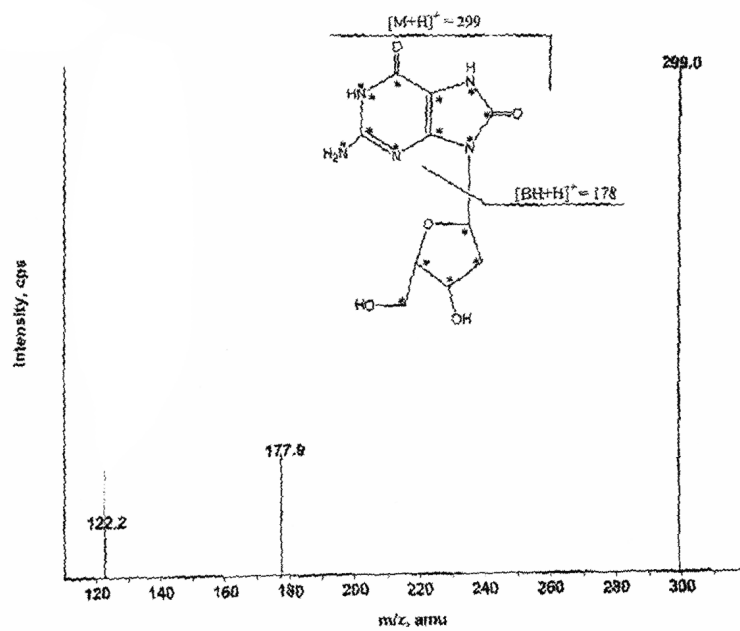

Figure 2 ESI-MS of the uniformly  $^{13}\text{C}$ ,  $^{15}\text{N}$  labeled 8-oxodG standard

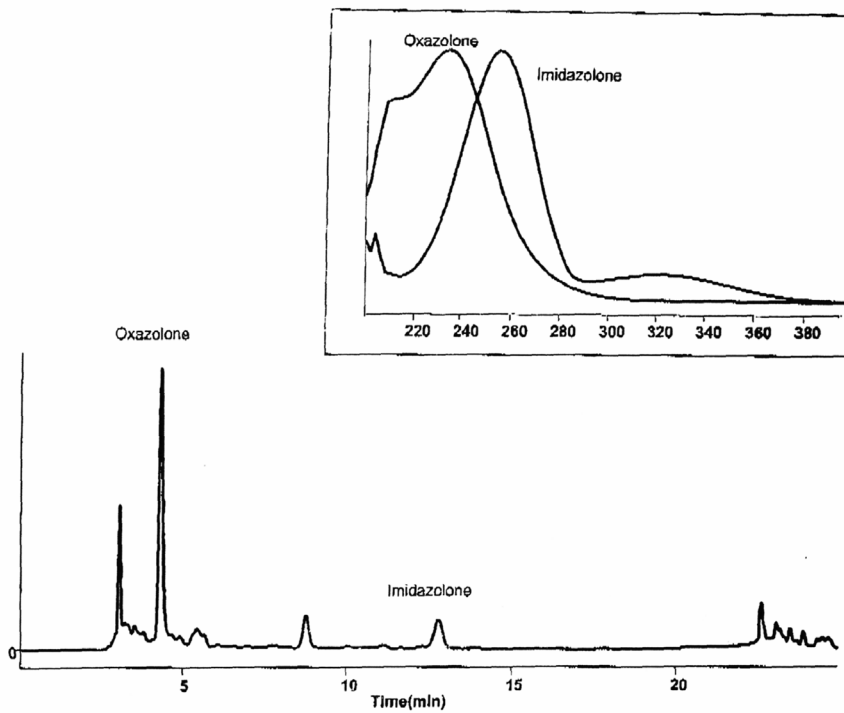

Figure 3 HPLC Chromatogram of converting imidazolone nucleoside to oxazolone nucleoside

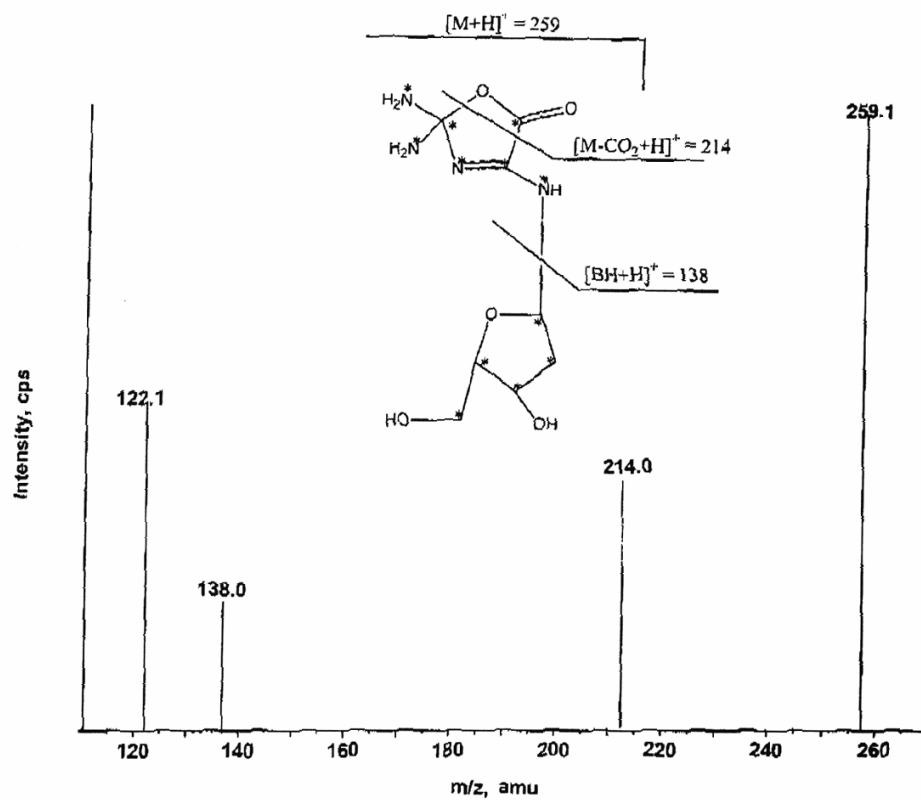

Figure 4 ESI-MS of the uniformly <sup>13</sup>C, <sup>15</sup>N labeled oxazolone standard

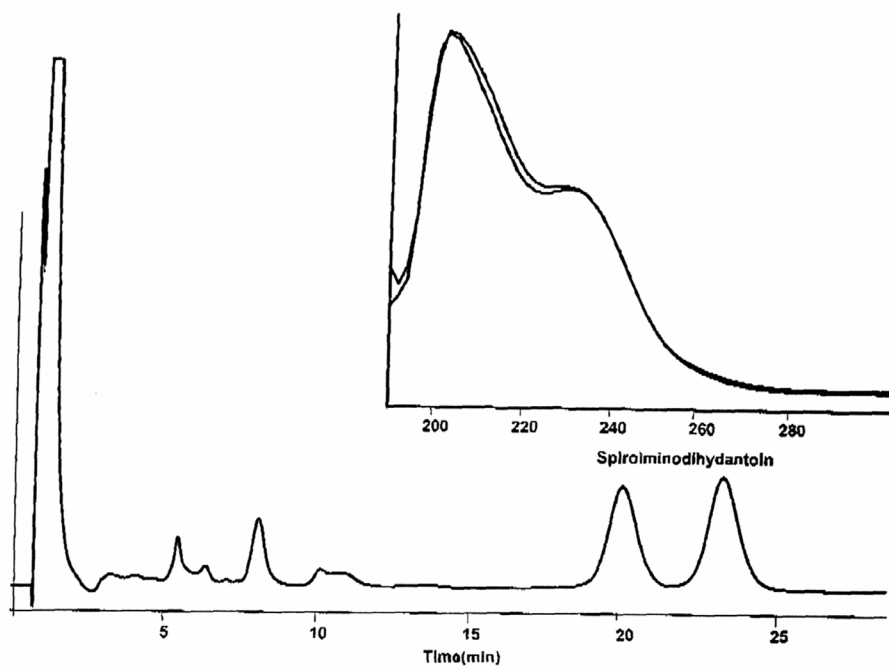

Figure 5 HPLC chromatogram of purification of spiroiminodihydroantoin standard from dC, dT, dG and dA nucleosides

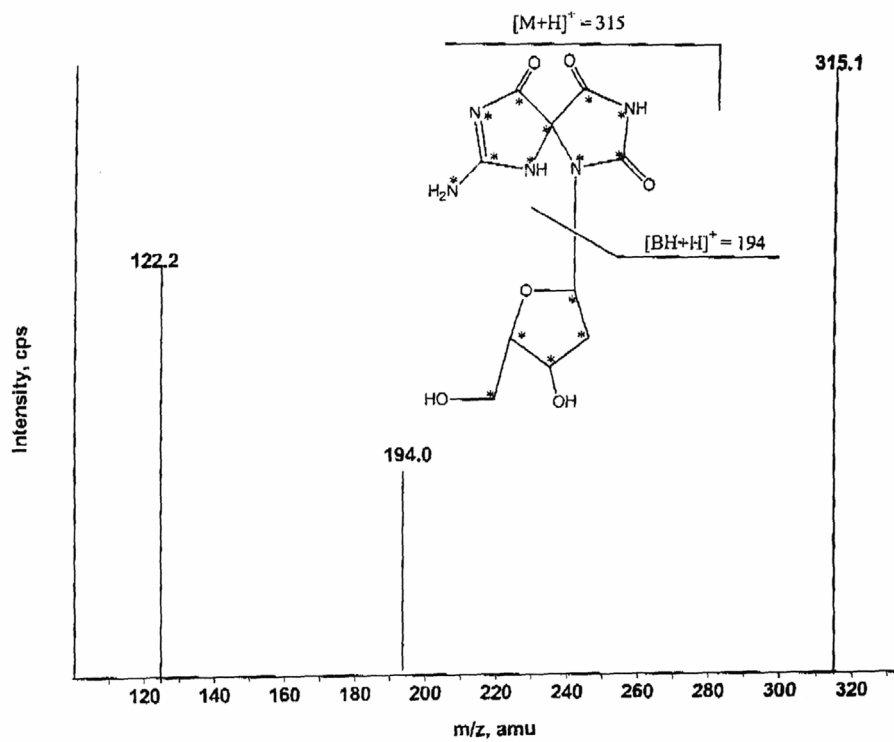

Figure 6 ESI-MS of the uniformly  $^{13}\text{C}$ ,  $^{15}\text{N}$  labeled spiroiminodihydantoin standard



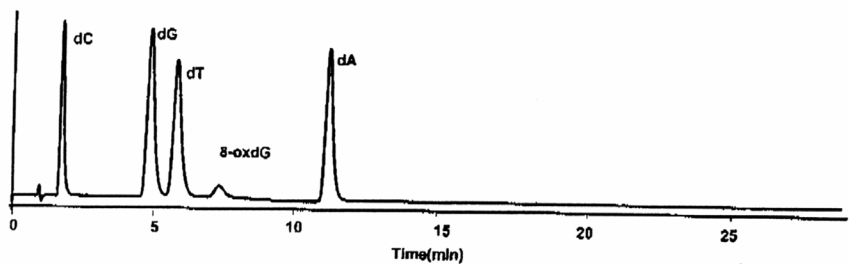

Figure 7 HPLC chromatogram of purification of 8-oxodG standard from dC, dT, dG and dA nucleosides



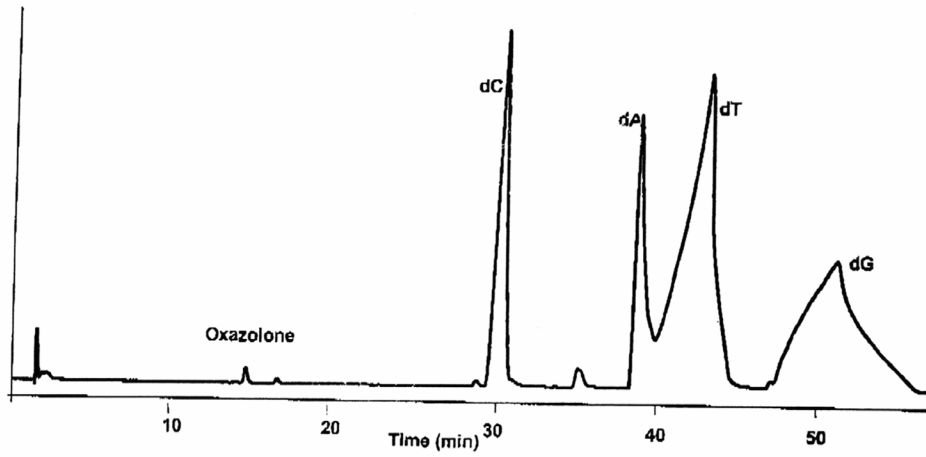

Figure 8 Purification of oxazolone standard from untreated DNA digestion mixture

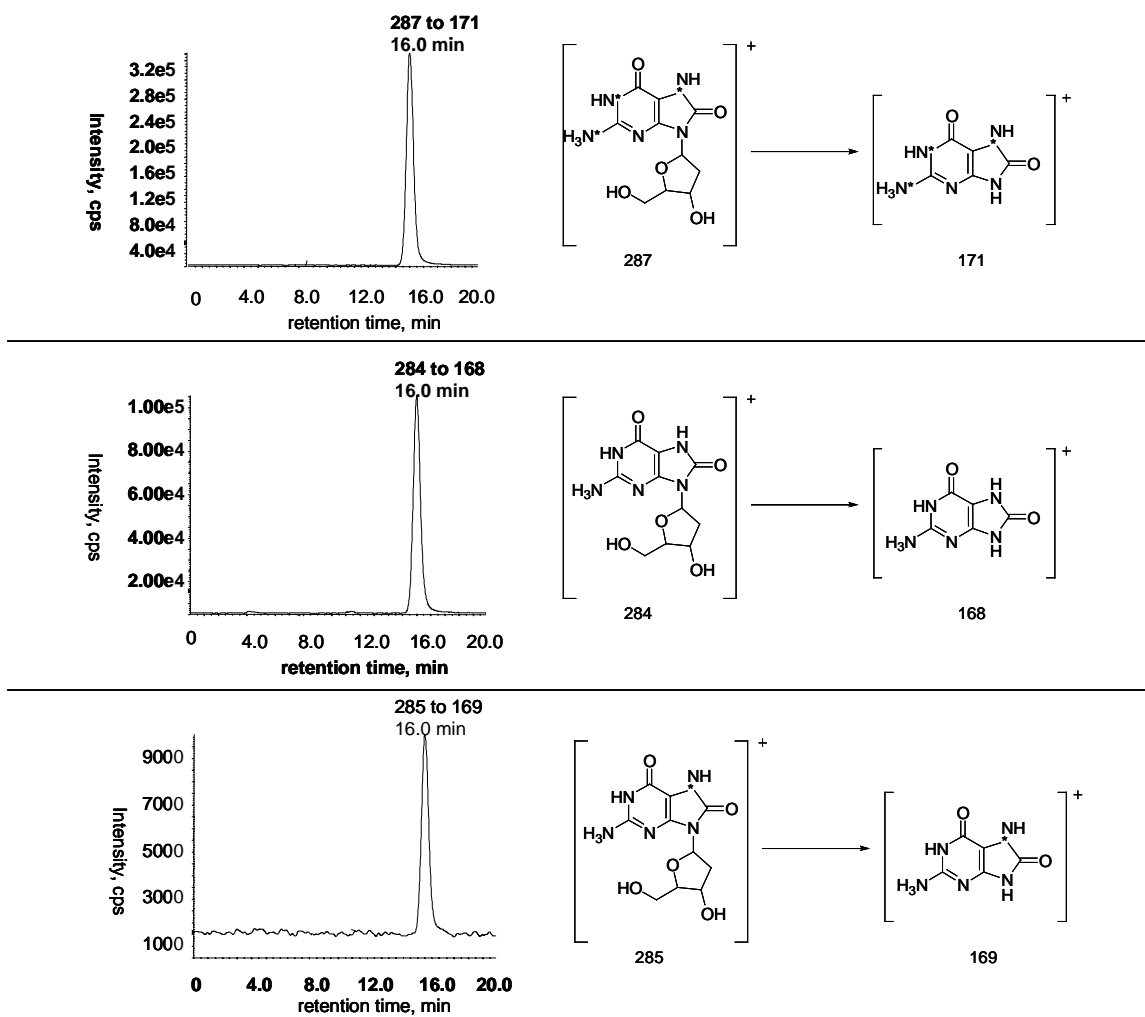

Figure 9 MRM chromatograms of detection of 8-oxodG in untreated DNA by LC-MS/MS in the presence of 7-<sup>15</sup>N-dG

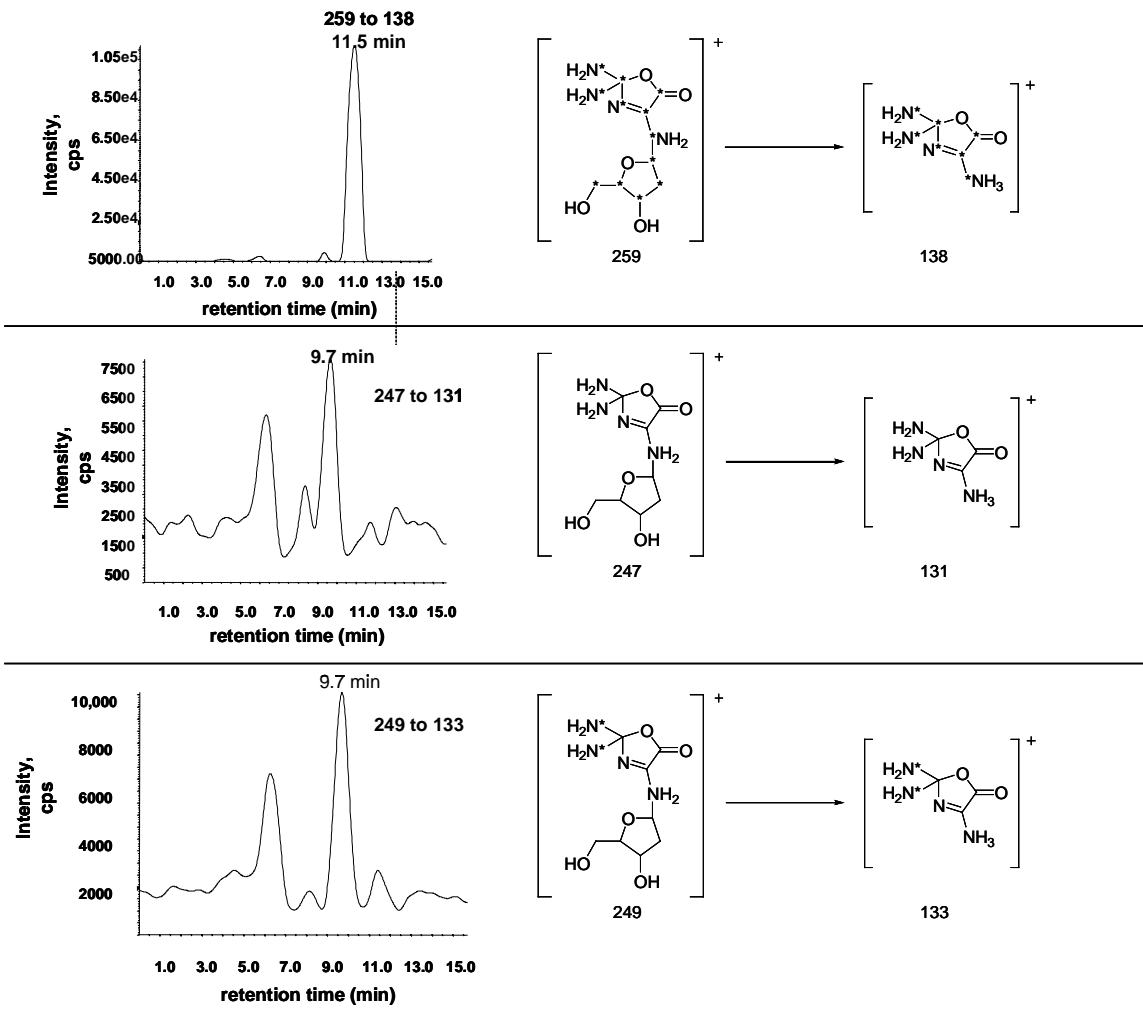

Figure 10 MRM chromatograms of attempt to detect oxazolone in untreated DNA by LC-MS/MS in the presence of 1,2,7-<sup>15</sup>N<sub>3</sub>-8-oxodG. No oxazolone was detected in untreated DNA.

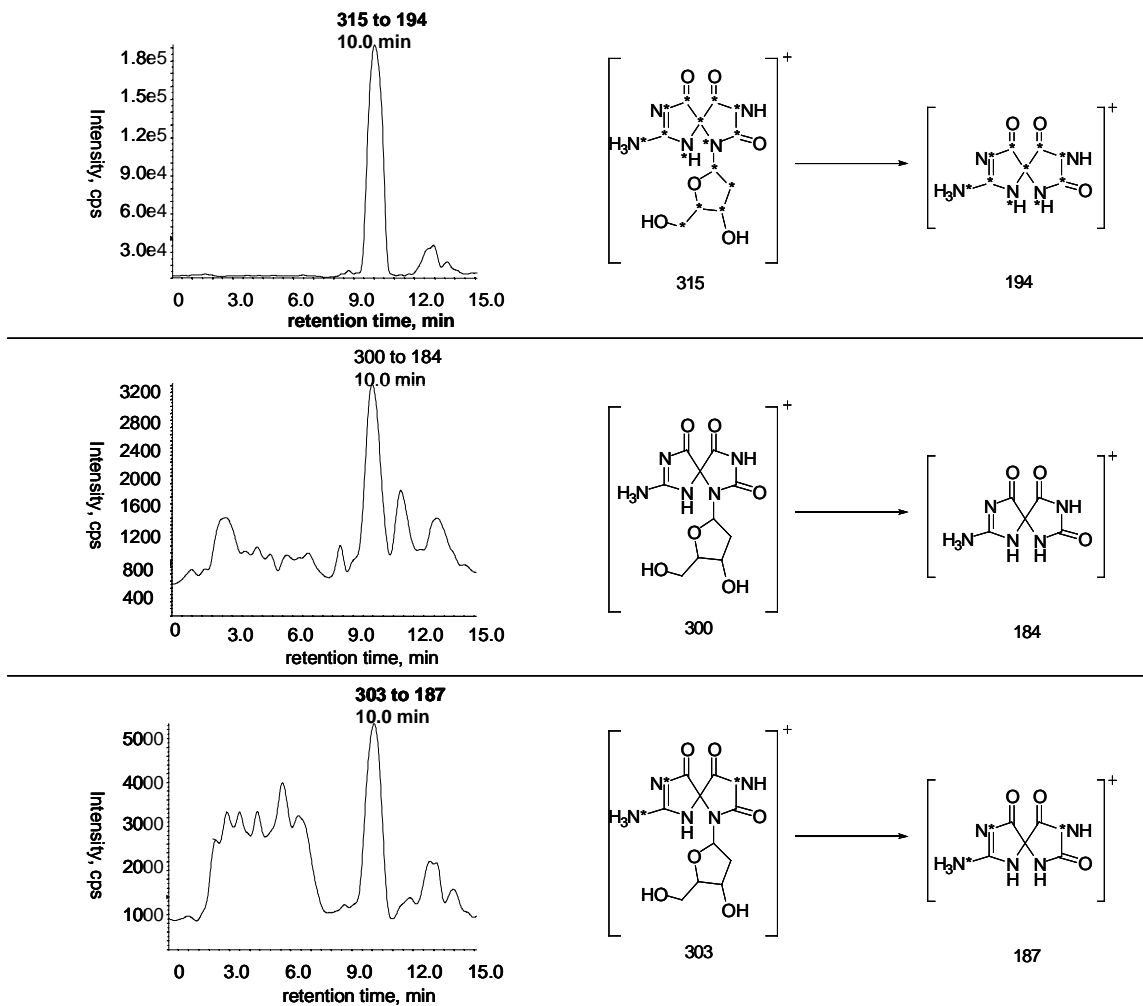

Figure 11 MRM chromatograms of detection of spiroiminodihydantoin in untreated DNA by LC-MS/MS on a

capillary C18 column in the presence of 1,2,7-<sup>15</sup>N<sub>3</sub>-8-oxodG.

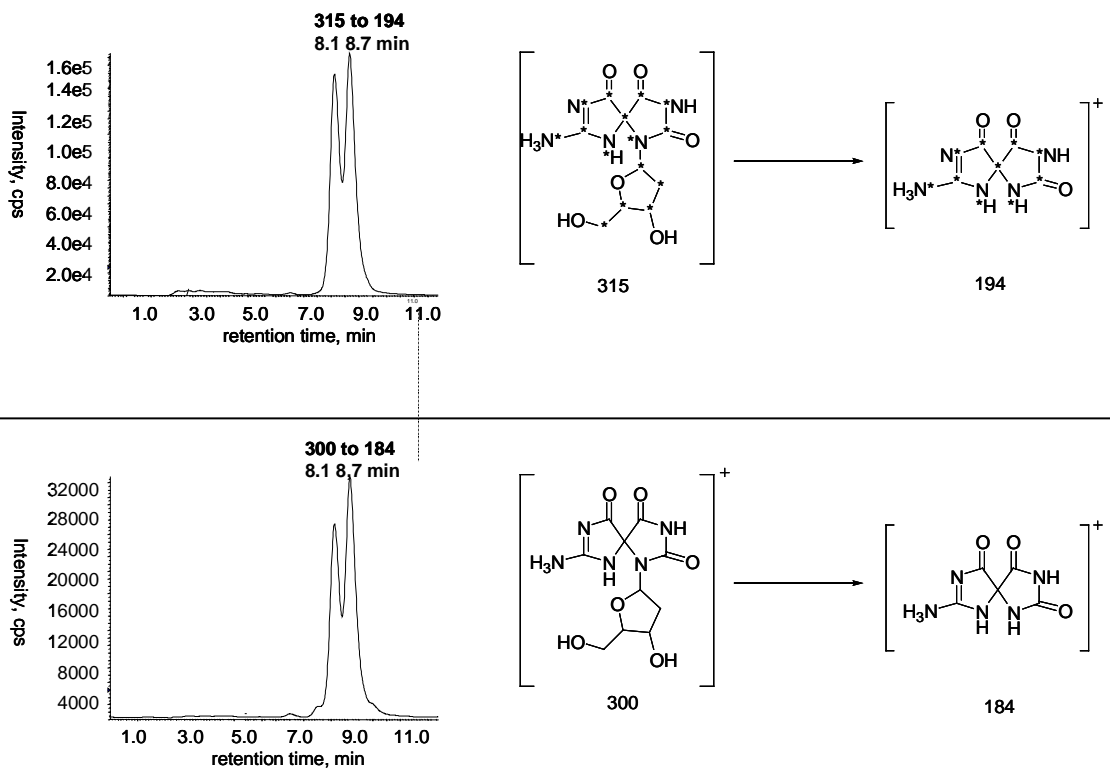

Figure 12 MRM chromatograms of detection of spiroiminodihydantoin in untreated DNA by LC-MS/MS on a capillary hypercarb column

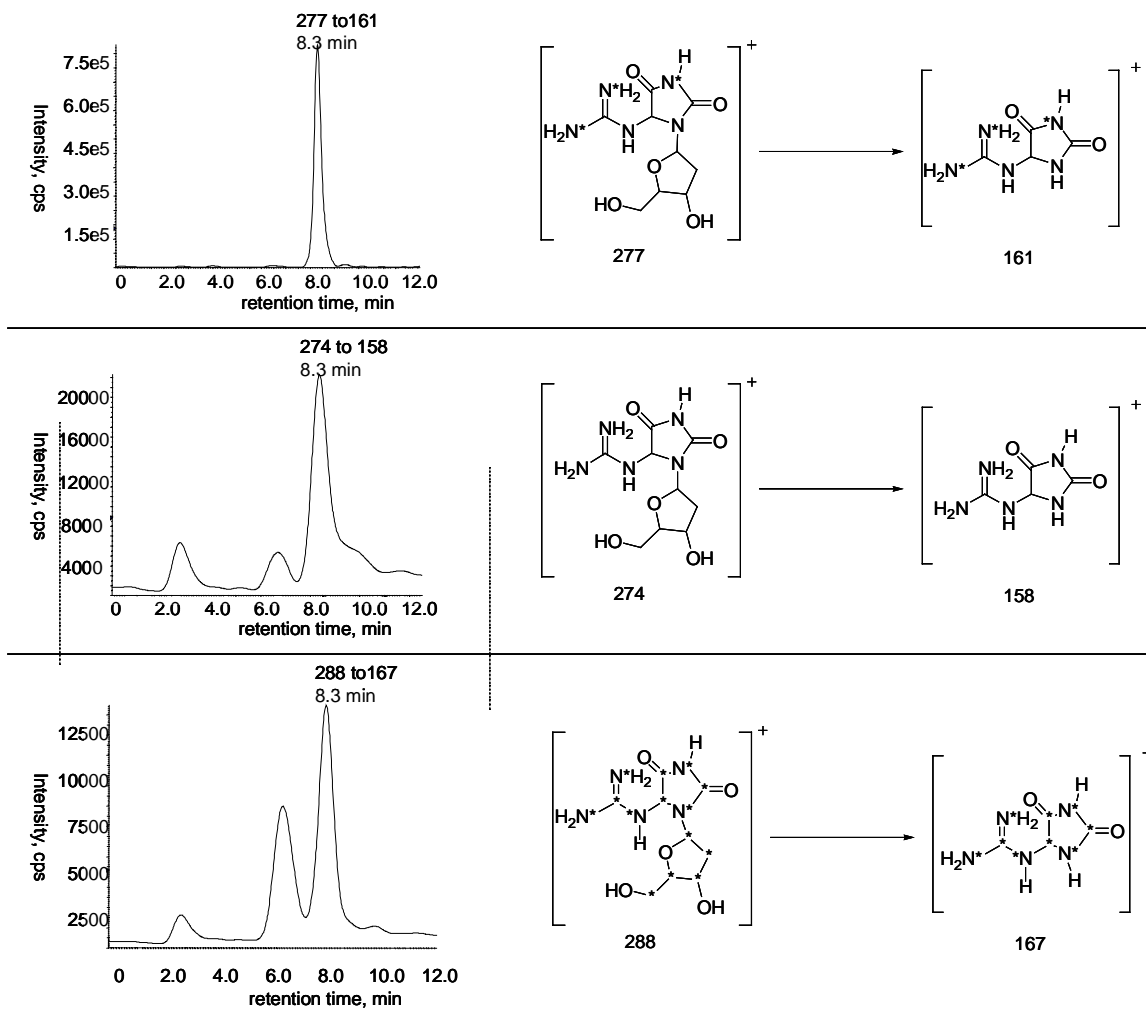

Figure 13 MRM chromatograms of detection of guanidinohydantoin in untreated DNA by LC-MS/MS in the presence of uniformly  $^{13}\text{C}$ ,  $^{15}\text{N}$  labeled 8-oxodG.



## Calculation Equations

### 1. Calculation of the yields of DNA digestion

- (1) dG from DNA digestion:  $dG \text{ (mol)} = {}^{15}\text{NdG} \text{ (mol)} * \text{response ratio}(dG/{}^{15}\text{NdG})$
- (2) molar ratio between dG and  ${}^{15}\text{NdG} = dG(\text{mol})/{}^{15}\text{NdG} \text{ (mol)}$
- (3) theoretical dG:  $dG \text{ (mol)} = \text{DNA(g)}/(\text{average nucleotide M.W, } 331 \text{ g/mol})/4$
- (4) yield of digestion =  $dG \text{ from digestion (mol)}/ dG \text{ from theoretical calculation (mol)}$

### 2. Calculation of the artifacts of 8-oxodG from spurious oxidation of dG

- MRM signal of 8-oxodG labeled internal standard = A  
MRM signal of 8-oxodG = B  
MRM signal of 7- ${}^{15}\text{N}$ -8-oxodG = C  
Molar ratio between dg and  ${}^{15}\text{NdG} = D$   
Labeled 8-oxodG internal standard (mol) = E

7- ${}^{15}\text{N}$ -8-oxodG (mol) =  $C/A * E$  (assumption: the response ratio between 7- ${}^{15}\text{N}$ -8-oxodG and labeled 8-oxodG internal standard = 1)

8-oxodG (mol) =  $B/A * \text{response ratio (8-oxodG/8-oxodG internal standard)} * E$

artifacts of 8-oxodG (mol) = 7- ${}^{15}\text{N}$ -8-oxodG (mol) \* D

corrected 8-oxodG (mol) = 8-oxodG (mol) – artifacts of 8oxodG (mol)

### 3. Calculation of the artifacts of spiroiminodihydantoin from spurious oxidation of 8-oxodG

- MRM signal of spiro labeled internal standard = A  
MRM signal of spiro = B  
MRM signal of  ${}^{15}\text{N}_3$ -spiro = C  
8-oxodG (mol) = D  
1,2,7- ${}^{15}\text{N}$ -8-oxodG (mol) = E  
labeled spiro internal standard (mol) = F  
mol% of oxidation of 1,2,7- ${}^{15}\text{N}$ -8-oxodG to  ${}^{15}\text{N}_3$ -spiro = G

spiro (mol) =  $B/A * \text{response ratio (spiro/spiro internal standard)} * F$

${}^{15}\text{N}_3$ -spiro (mol) =  $C/A * F$  (assumption: the response ratio between  ${}^{15}\text{N}_3$ -spiro and labeled spiro internal standard =1)

$G = {}^{15}\text{N}_3\text{-spiro (mol)}/E * 100$

Artifacts of spiro (mol) =  $G * D$

Corrected spiro (mol) = spiro (mol) – artifacts of spiro (mol)

### 4. Calculation of the artifacts of guanidinohydantoin from spurious oxidation of 8-oxodG

- MRM signal of guanidino labeled internal standard = A  
MRM signal of guanidino = B  
MRM signal of uniformly  ${}^{13}\text{C}$ ,  ${}^{15}\text{N}$  labeled guanidino = C  
8-oxodG (mol) = D  
uniformly  ${}^{13}\text{C}$ ,  ${}^{15}\text{N}$  labeled 8-oxodG (mol) = E  
labeled guanidino internal standard (mol) = F  
mol% of oxidation of uniformly  ${}^{13}\text{C}$ ,  ${}^{15}\text{N}$  labeled 8-oxodG to uniformly  ${}^{13}\text{C}$ ,  ${}^{15}\text{N}$  labeled guanidino = G

guanidino (mol) = B/A \* response ratio (guanidino/guanidino internal standard) \* F

uniformly <sup>13</sup>C, <sup>15</sup>N labeled guanidino (mol) = C/A \* F (assumption: the response ratio between uniformly <sup>13</sup>C, <sup>15</sup>N labeled guanidino and labeled guanidino internal standard =1)

G = uniformly <sup>13</sup>C, <sup>15</sup>N labeled guanidino (mol)/E \*100

Artifacts of guanidino (mol) = G \* D

Corrected guanidino (mol) = guanidino (mol) – artifacts of guanidino (mol)
